# Supplementary material for: Immunosuppressive Effect of Exosomes from Mesenchymal Stromal Cells in Defined Medium on Experimental Colitis
Source: PubMed Central journal article supplement — Int J Stem Cells. 2019 Jun 30;12(3):440–8. doi: 10.15283/ijsc18139 (PMC6881044; doi:10.15283/ijsc18139), 2019-06-30
Supplement: IJSC-12-440_Supple.pdf [file IJSC-12-440_Supple.pdf]

**Table S1.** The disease activity index scoring, based on the clinical sign of colitis

|   | Score bleeding             | Stool consistency | Body weight changes     |
|---|----------------------------|-------------------|-------------------------|
| 0 | Negative                   | Formed            | With no change/increase |
| 1 | Positive occult blood test | Soft              | 1%~5% decrease          |
| 2 | Visible bleeding           | Loose             | 6%~10% decrease         |
| 3 | Severe bleeding            | Watery            | 11%~20% decrease        |
| 4 |                            |                   | More than 20% decrease  |

**Table S2.** Colonic histological scoring system

| Histological feature               | Score | Description                 |
|------------------------------------|-------|-----------------------------|
| Epithelial damage                  | 0     | None                        |
|                                    | 1     | 0%~5% loss of epithelium    |
|                                    | 2     | 5%~10% loss of epithelium   |
|                                    | 3     | Over 10% loss of epithelium |
| Loss of crypts                     | 0     | None                        |
|                                    | 1     | 0%~10% loss of crypts       |
|                                    | 2     | 10%~20% loss of crypts      |
|                                    | 3     | Over 20% loss of crypts     |
| Infiltration of inflammatory cells | 0     | None                        |
|                                    | 1     | Mild (10%)                  |
|                                    | 2     | Moderate (25%)              |
|                                    | 3     | Severe (40%)                |
